# Supplementary material
Source: HighWire-hosted journal article supplement (https://erj.ersjournals.com/content/60/3/2200589)

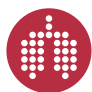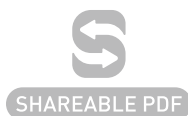

# Air pollution, SARS-CoV-2 incidence and COVID-19 mortality in Rome: a longitudinal study

Federica Nobile<sup>1</sup>, Paola Michelozzi<sup>1</sup>, Carla Ancona<sup>1</sup>, Giovanna Cappai<sup>1</sup>, Giulia Cesaroni<sup>1</sup>, Marina Davoli<sup>1</sup>, Mirko Di Martino<sup>1</sup>, Emanuele Nicastrì<sup>2</sup>, Enrico Girardi<sup>2</sup>, Alessia Beccacece<sup>1,2</sup>, Paola Scognamiglio<sup>2</sup>, Chiara Sorge<sup>1</sup>, Francesco Vairo<sup>2</sup> and Massimo Stafoggia<sup>1</sup>

<sup>1</sup>Department of Epidemiology of the Regional Health Service, ASL Roma 1, Rome, Italy. <sup>2</sup>National Institute for Infectious Diseases Lazzaro Spallanzani-IRCCS, Rome, Italy.

Corresponding author: Massimo Stafoggia ([m.stafoggia@deplazio.it](mailto:m.stafoggia@deplazio.it))

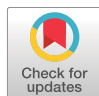

Shareable abstract (@ERSpublications)

Long-term exposure to air pollution (PM<sub>2.5</sub> and NO<sub>2</sub>) was associated with COVID-19 mortality, but not with SARS-CoV-2 incidence, in a large observational population-based cohort of >1.5 million subjects in Rome, Italy <https://bit.ly/3zZjjSC>

**Cite this article as:** Nobile F, Michelozzi P, Ancona C, *et al.* Air pollution, SARS-CoV-2 incidence and COVID-19 mortality in Rome: a longitudinal study. *Eur Respir J* 2022; 60: 2200589 [DOI: 10.1183/13993003.00589-2022].

This single-page version can be shared freely online.

Copyright ©The authors 2022. This version is distributed under the terms of the Creative Commons Attribution Non-Commercial Licence 4.0. For commercial reproduction rights and permissions contact [permissions@ersnet.org](mailto:permissions@ersnet.org)

Received: 18 March 2022  
Accepted: 17 June 2022

*To the Editor:*

Chronic exposure to ambient air pollution has been related to increased mortality in the general population [1]. After the outbreak of the SARS-CoV-2 pandemic in 2019, there has been a fast proliferation of epidemiological studies linking ambient air pollution to coronavirus disease 2019 (COVID-19) incidence or adverse prognosis [2]. It has been hypothesised that ambient air pollution might increase human vulnerability to viruses by reducing immune defences, promoting a low-level chronic inflammatory state, or leading to chronic diseases [3]. Most studies have applied ecological designs, and failed to account for key individual-level or area-level determinants of COVID-19 spread or severity, such as demographic characteristics of the studied populations, socioeconomic or clinical susceptibility, and area-level proxies of disease spread such as mobility or population density [4].

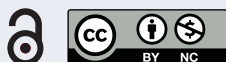

Supplement: inline-supplementary-material-1 [file inline-supplementary-material-1.pdf]
